# Supplementary figures and images for: A Combination of Glutaminase Inhibitor 968 and PD-L1 Blockade Boosts the Immune Response against Ovarian Cancer
Source: MDPI journal article supplement (doi:10.3390/biom11121749), 2021-11-23

**Supplementary Figure S1.** Correlation between GLS and immunosuppressive genes.

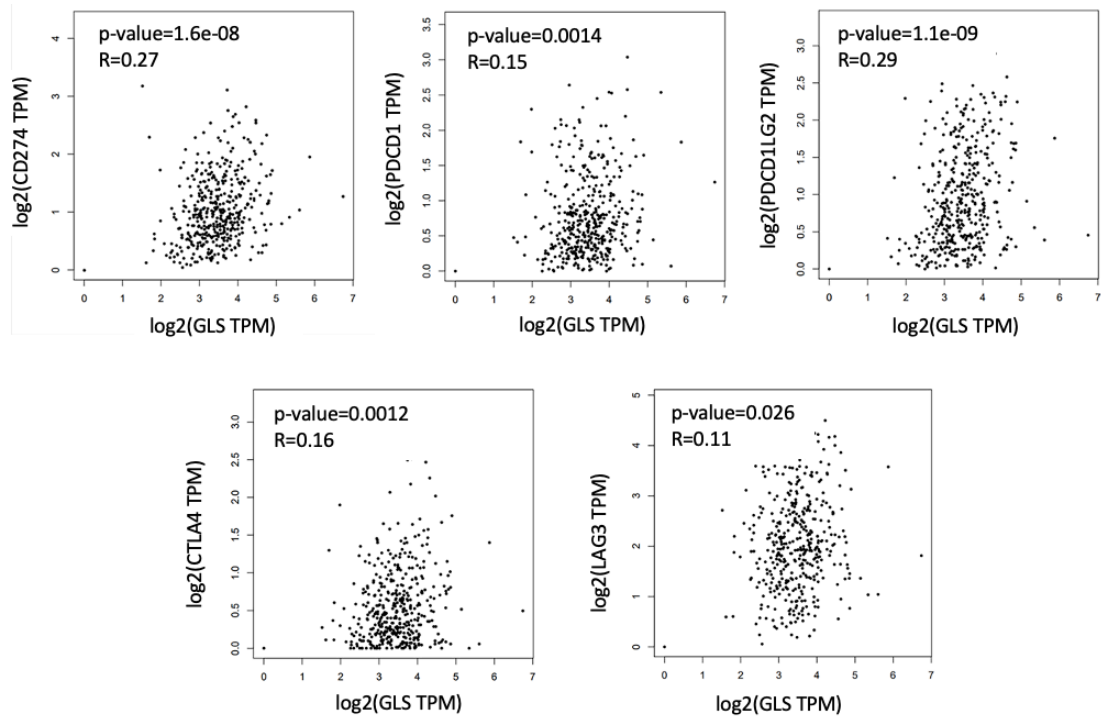

Supplement: s1 [file s1]
